# Supplementary material for: Mining metabolic pathways through gene expression
Source: PubMed Central journal article supplement — Bioinformatics. 2010 Jun 29;26(17):2128–35. doi: 10.1093/bioinformatics/btq344 (PMC2922890; doi:10.1093/bioinformatics/btq344), 2010-06-29
Supplement: supp_btq344_pathranker_supplementary.pdf [file supp_btq344_pathranker_supplementary.pdf]

---

## Supplementary Material: Mining metabolic pathways through gene expression

Timothy Hancock<sup>1\*</sup>; Ichigaku Takigawa<sup>1</sup> and Hiroshi Mamitsuka<sup>1</sup>

<sup>1</sup> Bioinformatics Center, Institute for Chemical Research, Kyoto University, Japan

Received on XXXXX; revised on XXXXX; accepted on XXXXX

Associate Editor: XXXXXXXX

---

---

\*to whom correspondence should be addressed

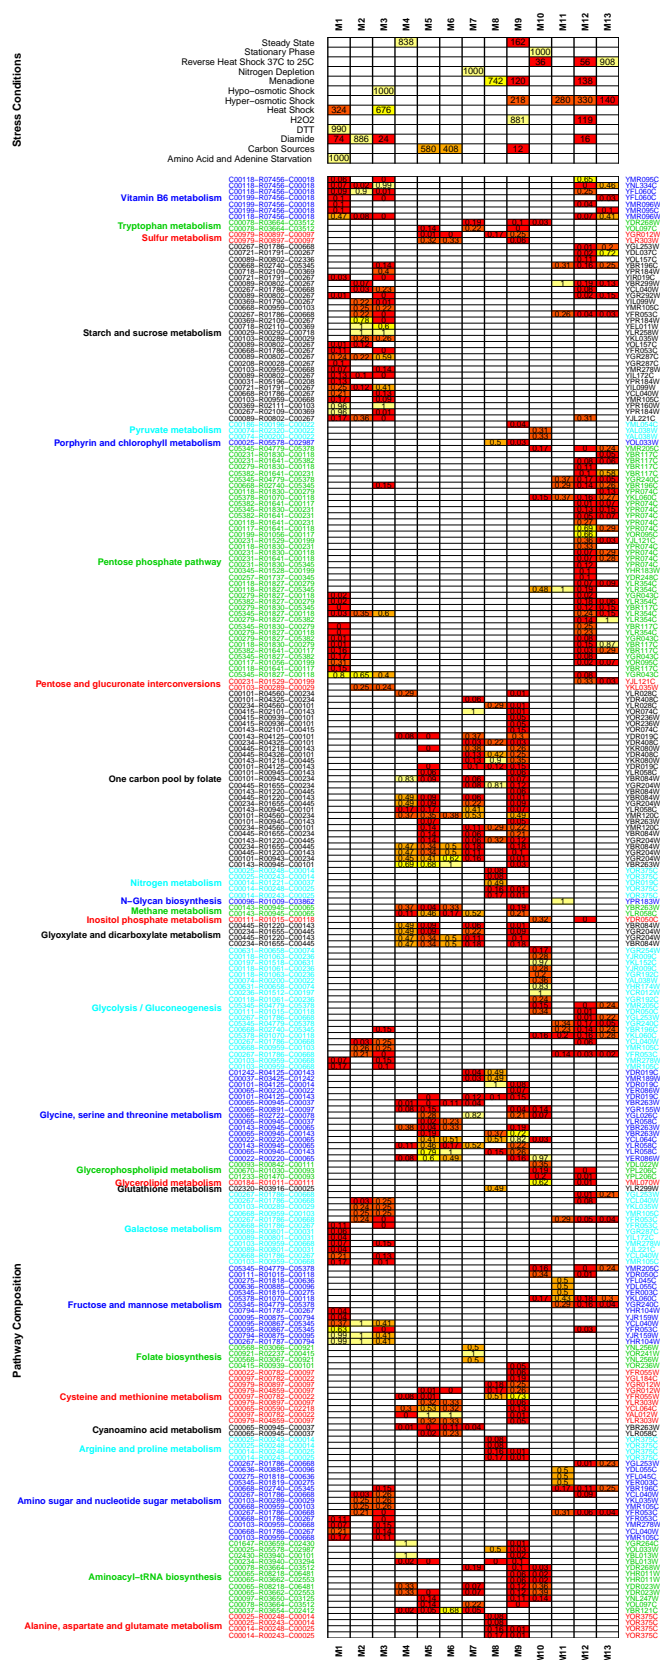

**Fig. 1.** The 3M pathway clustering results for clustering yeast stress conditions. The left image represents the cluster structure annotated by KEGG pathway, to-compound, reaction, from-compound on the top axis and gene on the bottom axis. The right image represents the confusion matrix between stress condition and cluster. Throughout both images yellow represent highly important cluster features and red represents less important features.

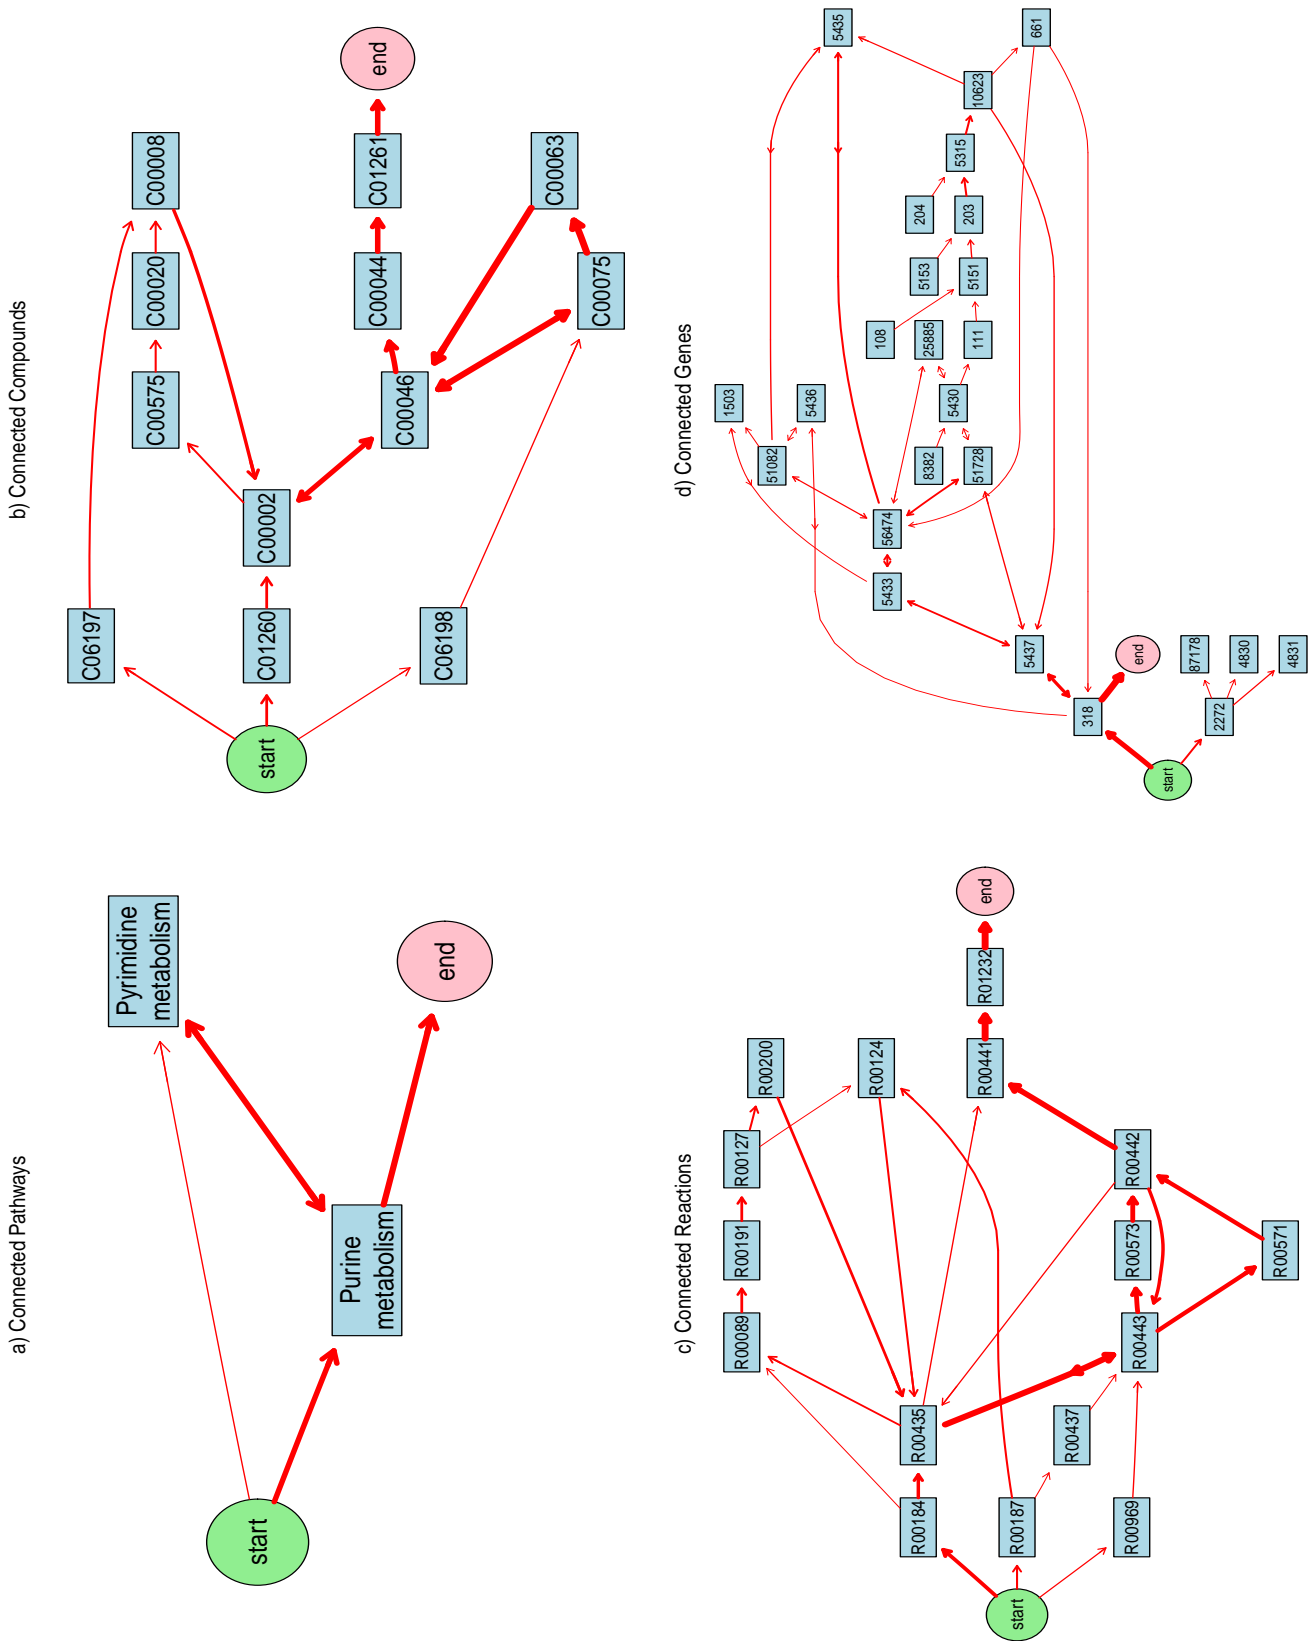

**Fig. 2.** The most connected components separated by connected pathways, compounds, reactions and genes identified by HME3M to classify insulin resistance. For all images the edge thickness represents the importance of that edge to the overall network.

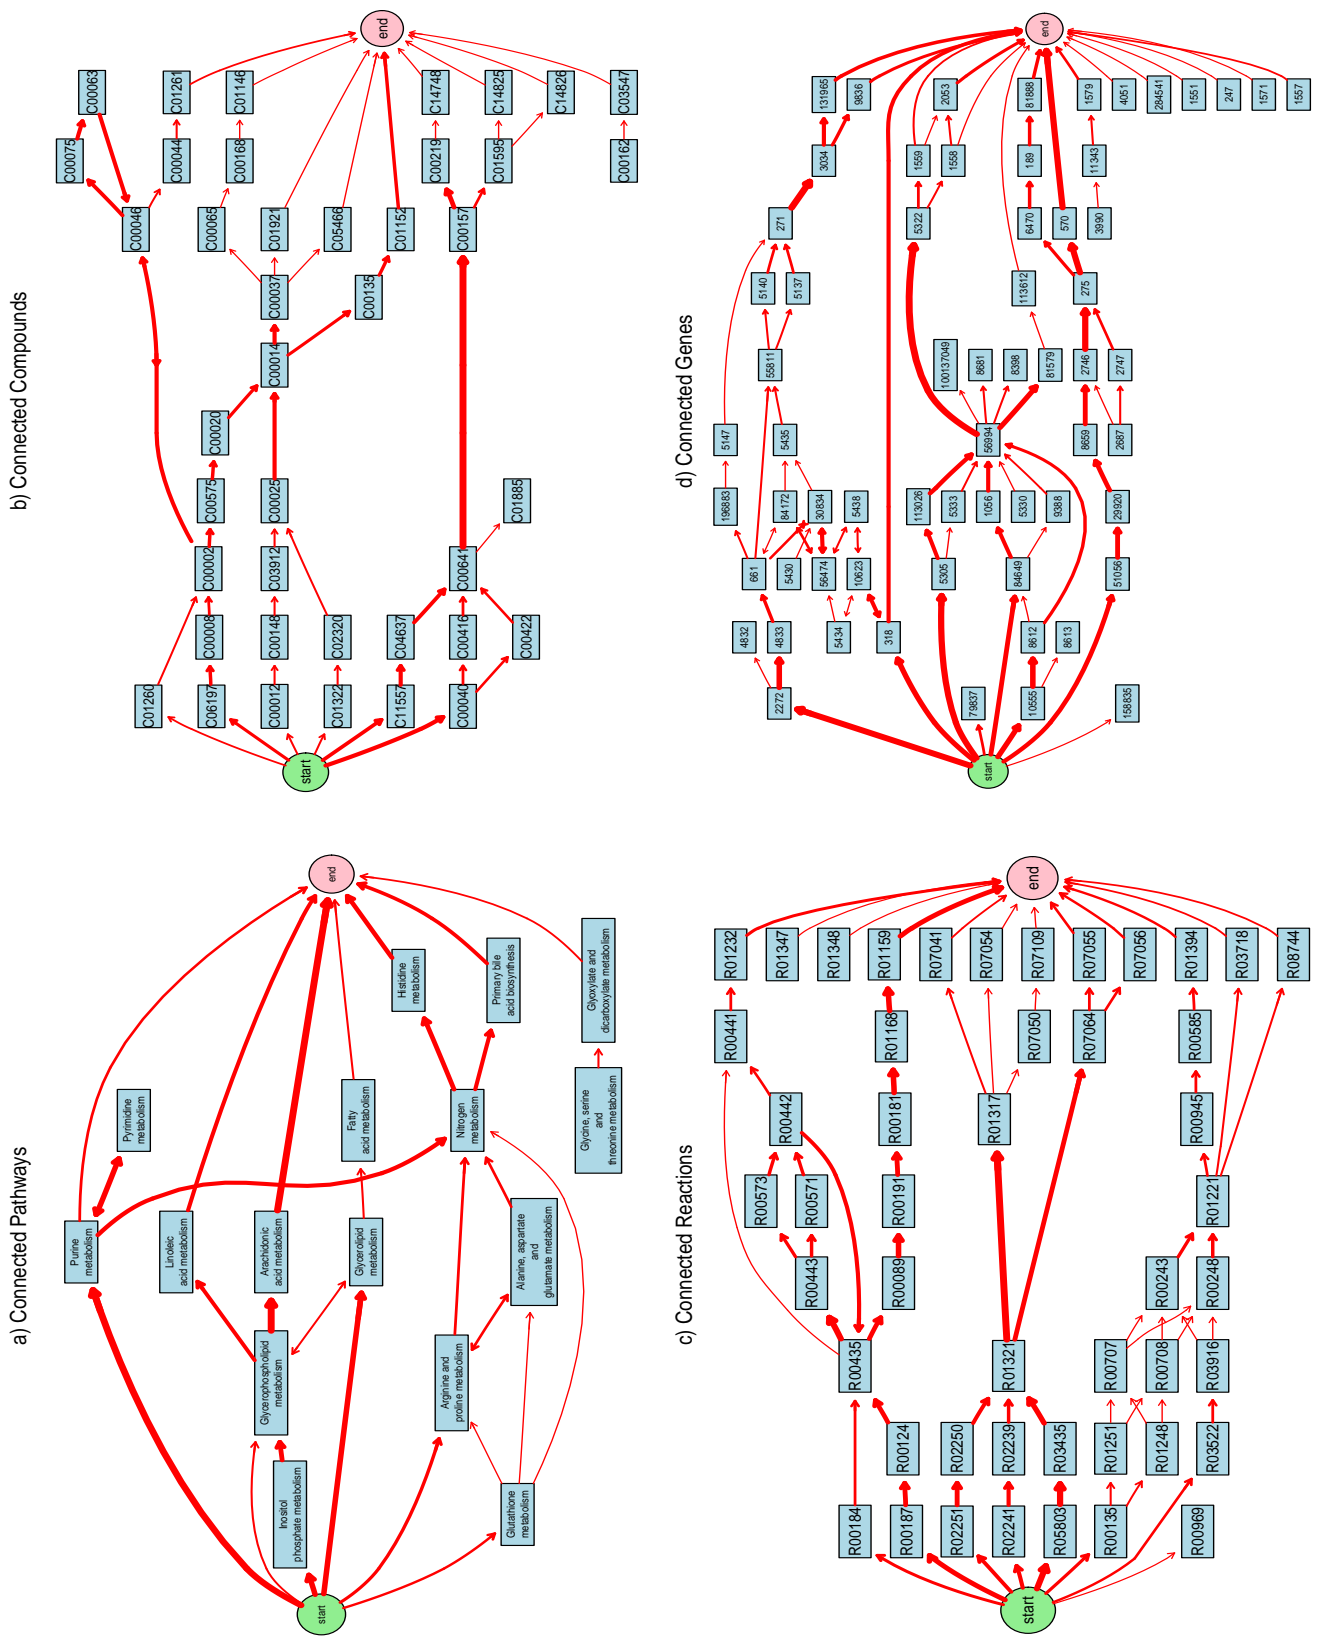

Fig. 3. The most connected components separated by connected pathways, compounds, reactions and genes identified by HME3M to classify insulin sensitivity. For all images the edge thickness represents the importance of that edge to the overall network.
